# Supplementary material
Source: publisher figshare collection journal article supplement (https://sage.figshare.com/ndownloader/files/36009539)
Supplement: Supplementary file 1 [file 36009539]

**Supplemental Table Legends**

Supplemental table 1. Summary of ophthalmology data from control male Cynomolgus monkeys of Cambodian, Chinese, and Vietnamese origin. The total instances observed and as a percentage of total evaluations performed with an analysis of deviance of p value between origins.

Supplemental table 2. Summary of ophthalmology data from control female Cynomolgus monkeys of Cambodian, Chinese, and Vietnamese origin. The total instances observed and as a percentage of total evaluations performed with an analysis of deviance of p value between origins.

Supplemental table 3.  Summary of clinical observation data by finding from control male Cynomolgus monkeys of Cambodian, Chinese, and Vietnamese origin. The total instances observed and as a percentage of total evaluations performed with an analysis of deviance of p value between origins.

Supplemental table 4. Summary of clinical observation data by finding from control female Cynomolgus monkeys of Cambodian, Chinese, and Vietnamese origin. The total instances observed and as a percentage of total evaluations performed with an analysis of deviance of p value between origins.

Supplemental table 5. Summary of clinical observation data by category from control male and female Cynomolgus monkeys of Cambodian, Chinese, and Vietnamese origin. The total instances observed and as a percentage of total evaluations performed with an analysis of deviance of p value between origins.

Supplemental table 6: Summary of pretreatment body weights (kg) of males and females by origin. Footnotes a, b, and c represent statistically significant Cambodian-Chinese, Cambodian-Vietnamese, and Chinese-Vietnamese mean pairwise comparison respectively. Significant differences in mean values are indicated as * for the ≤ 0.05 level and ** for the ≤ 0.01 level.

Supplemental table 7: Summary of end of study body weights (kg) of males and females by origin. Footnotes a, b, and c represent statistically significant Cambodian-Chinese, Cambodian-Vietnamese, and Chinese-Vietnamese mean pairwise comparison respectively. Significant differences in mean values are indicated as * for the ≤ 0.05 level and ** for the ≤ 0.01 level.

Supplemental table 8. Summary of hematology data from control male Cynomolgus monkeys of Cambodian, Chinese, and Vietnamese origin. The group mean with 95% confidence intervals (CI), standard deviation (SD), sample size (N), median, and central 95% range of the data are presented for both pretreatment and final intervals for each geographic origin. Footnotes a, b, and c represent statistically significant Cambodian-Chinese, Cambodian-Vietnamese, and Chinese-Vietnamese mean pairwise comparison respectively.

Supplemental table 9. Summary of hematology data from control female Cynomolgus monkeys of Cambodian, Chinese, and Vietnamese origin. The group mean with 95% confidence intervals (CI), standard deviation (SD), sample size (N), median, and central 95% range of the data are presented for both pretreatment and final intervals for each geographic origin. Footnotes a, b, and c represent statistically significant Cambodian-Chinese, Cambodian-Vietnamese, and Chinese-Vietnamese mean pairwise comparison respectively.

Supplemental table 10.  Summary of hematology data post hoc comparison results. Pairwise differences in mean values are displayed. Footnotes a and b represent a statistically significant main effect of origin in males and females, respectively. P values for statistically significant pairwise comparisons are included in brackets.

Supplemental table 11. Summary of coagulation data from control male Cynomolgus monkeys of Cambodian, Chinese, and Vietnamese origin. The group mean with 95% confidence intervals (CI), standard deviation (SD), sample size (N), median, and central 95% range of the data are presented for both pretreatment and final intervals for each geographic origin. Footnotes a, b, and c represent statistically significant Cambodian-Chinese, Cambodian-Vietnamese, and Chinese-Vietnamese mean pairwise comparison respectively.

Supplemental table 12. Summary of coagulation data from control female Cynomolgus monkeys of Cambodian, Chinese, and Vietnamese origin. The group mean with 95% confidence intervals (CI), standard deviation (SD), sample size (N), median, and central 95% range of the data are presented for both pretreatment and final intervals for each geographic origin. Footnotes a, b, and c represent statistically significant Cambodian-Chinese, Cambodian-Vietnamese, and Chinese-Vietnamese mean pairwise comparison respectively.

Supplemental table 13.  Summary of coagulation data post hoc comparison results. Pairwise differences in mean values are displayed. Footnotes a and b represent a statistically significant main effect of origin in males and females, respectively. P values for statistically significant pairwise comparisons are included in brackets.

Supplemental table 14. Summary of clinical chemistry data from control male Cynomolgus monkeys of Cambodian, Chinese, and Vietnamese origin. The group mean with 95% confidence intervals (CI), standard deviation (SD), sample size (N), median, and central 95% range of the data are presented for both pretreatment and final intervals for each geographic origin. Footnotes a, b, and c represent statistically significant Cambodian-Chinese, Cambodian-Vietnamese, and Chinese-Vietnamese mean pairwise comparison respectively.

Supplemental table 15. Summary of clinical chemistry data from control female Cynomolgus monkeys of Cambodian, Chinese, and Vietnamese origin. The group mean with 95% confidence intervals (CI), standard deviation (SD), sample size (N), median, and central 95% range of the data are presented for both pretreatment and final intervals for each geographic origin. Footnotes a, b, and c represent statistically significant Cambodian-Chinese, Cambodian-Vietnamese, and Chinese-Vietnamese mean pairwise comparison respectively.

Supplemental table 16. Summary of clinical chemistry data post hoc comparison results. Pairwise differences in mean values are displayed. Footnotes a and b represent a statistically significant main effect of origin in males and females, respectively. P values for statistically significant pairwise comparisons are included in brackets.

Supplemental table 17. Microscopic findings of the endocrine system and reproductive tract for control male and female Cynomolgus monkeys of Cambodian, Chinese, and Vietnamese origin; incidence and incidence range provided. Footnotes a, b, and c represent statistically significant Cambodian-Chinese, Cambodian-Vietnamese, and Chinese-Vietnamese mean pairwise comparison respectively. Significant differences in mean values are indicated as * for the ≤ 0.05 level and ** for the ≤ 0.01 level.

Supplemental table 18. Microscopic findings of the cardiovascular system for control male and female Cynomolgus monkeys of Cambodian, Chinese, and Vietnamese origin; incidence and incidence range provided. Footnotes a, b, and c represent statistically significant Cambodian-Chinese, Cambodian-Vietnamese, and Chinese-Vietnamese mean pairwise comparison respectively. Significant differences in mean values are indicated as * for the ≤ 0.05 level and ** for the ≤ 0.01 level.

Supplemental table 19. Microscopic findings of the immune system for control male and female Cynomolgus monkeys of Cambodian, Chinese, and Vietnamese origin; incidence and incidence range provided. Footnotes a, b, and c represent statistically significant Cambodian-Chinese, Cambodian-Vietnamese, and Chinese-Vietnamese mean pairwise comparison respectively. Significant differences in mean values are indicated as * for the ≤ 0.05 level and ** for the ≤ 0.01 level.

Supplemental table 20. Microscopic findings of the musculoskeletal system for control male and female Cynomolgus monkeys of Cambodian, Chinese, and Vietnamese origin; incidence and incidence range provided. Mean pairwise comparison (Cambodian-Chinese, Cambodian-Vietnamese, and Chinese-Vietnamese) was performed and no statistically significant values were identified.

Supplemental table 21. Microscopic findings of the gastrointestinal system for control male and female Cynomolgus monkeys of Cambodian, Chinese, and Vietnamese origin; incidence and incidence range provided. Footnotes a, b, and c represent statistically significant Cambodian-Chinese, Cambodian-Vietnamese, and Chinese-Vietnamese mean pairwise comparison respectively. Significant differences in mean values are indicated as * for the ≤ 0.05 level and ** for the ≤ 0.01 level.

Supplemental table 22. Microscopic findings of the nervous system for control male and female Cynomolgus monkeys of Cambodian, Chinese, and Vietnamese origin; incidence and incidence range provided. Mean pairwise comparison (Cambodian-Chinese, Cambodian-Vietnamese, and Chinese-Vietnamese) was performed and no statistically significant values were identified.

Supplemental table 23. Microscopic findings of the urinary system for control male and female Cynomolgus monkeys of Cambodian, Chinese, and Vietnamese origin; incidence and incidence range provided. Footnotes a, b, and c represent statistically significant Cambodian-Chinese, Cambodian-Vietnamese, and Chinese-Vietnamese mean pairwise comparison respectively. Significant differences in mean values are indicated as * for the ≤ 0.05 level and ** for the ≤ 0.01 level.

Supplemental table 24. Microscopic findings of the respiratory system for control male and female Cynomolgus monkeys of Cambodian, Chinese, and Vietnamese origin; incidence and incidence range provided. Footnotes a, b, and c represent statistically significant Cambodian-Chinese, Cambodian-Vietnamese, and Chinese-Vietnamese mean pairwise comparison respectively. Significant differences in mean values are indicated as * for the ≤ 0.05 level and ** for the ≤ 0.01 level.

Supplemental table 25. Microscopic findings of the integumentary system for control male and female Cynomolgus monkeys of Cambodian, Chinese, and Vietnamese origin; incidence and incidence range provided. Mean pairwise comparison (Cambodian-Chinese, Cambodian-Vietnamese, and Chinese-Vietnamese) was performed and no statistically significant values were identified.

Supplemental table 26. Microscopic findings of non-standard tissues for control male and female Cynomolgus monkeys of Cambodian, Chinese, and Vietnamese origin; incidence and incidence range provided. Mean pairwise comparison (Cambodian-Chinese, Cambodian-Vietnamese, and Chinese-Vietnamese) was performed and no statistically significant values were identified.

Supplemental table 27. Macroscopic observations for control male and female Cynomolgus monkeys of Cambodian, Chinese, and Vietnamese origin; incidence and incidence range provided. Footnotes a, b, and c represent statistically significant Cambodian-Chinese, Cambodian-Vietnamese, and Chinese-Vietnamese mean pairwise comparison respectively.

Supplemental table 28. Organ weight data for control male and female Cynomolgus monkeys of Cambodian, Chinese, and Vietnamese origin. Footnotes a, b, and c represent statistically significant Cambodian-Chinese, Cambodian-Vietnamese, and Chinese-Vietnamese mean pairwise comparison respectively.

Supplemental table 29. Summary of organ weight data post hoc comparison results. Pairwise differences in mean values are displayed to three significant figures. Footnotes a and b represent a statistically significant main effect of origin in males and females, respectively. P values for statistically significant pairwise comparisons are included in brackets.
